# Supplementary figures and images for: Activation mechanism of ATP-sensitive K+ channels explored with real-time nucleotide binding
Source: eLife journal article supplement (doi:10.7554/elife.41103), 2019-02-21

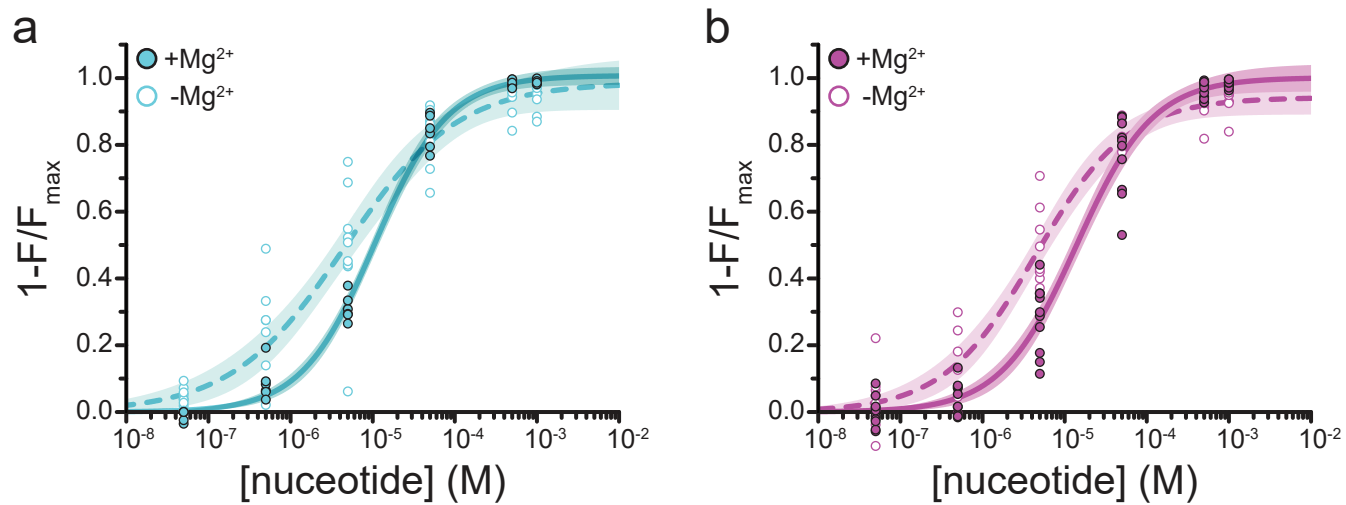

Figure 4--figure supplement 2

Supplement: supp [file elife-41103-supp-v1.zip]

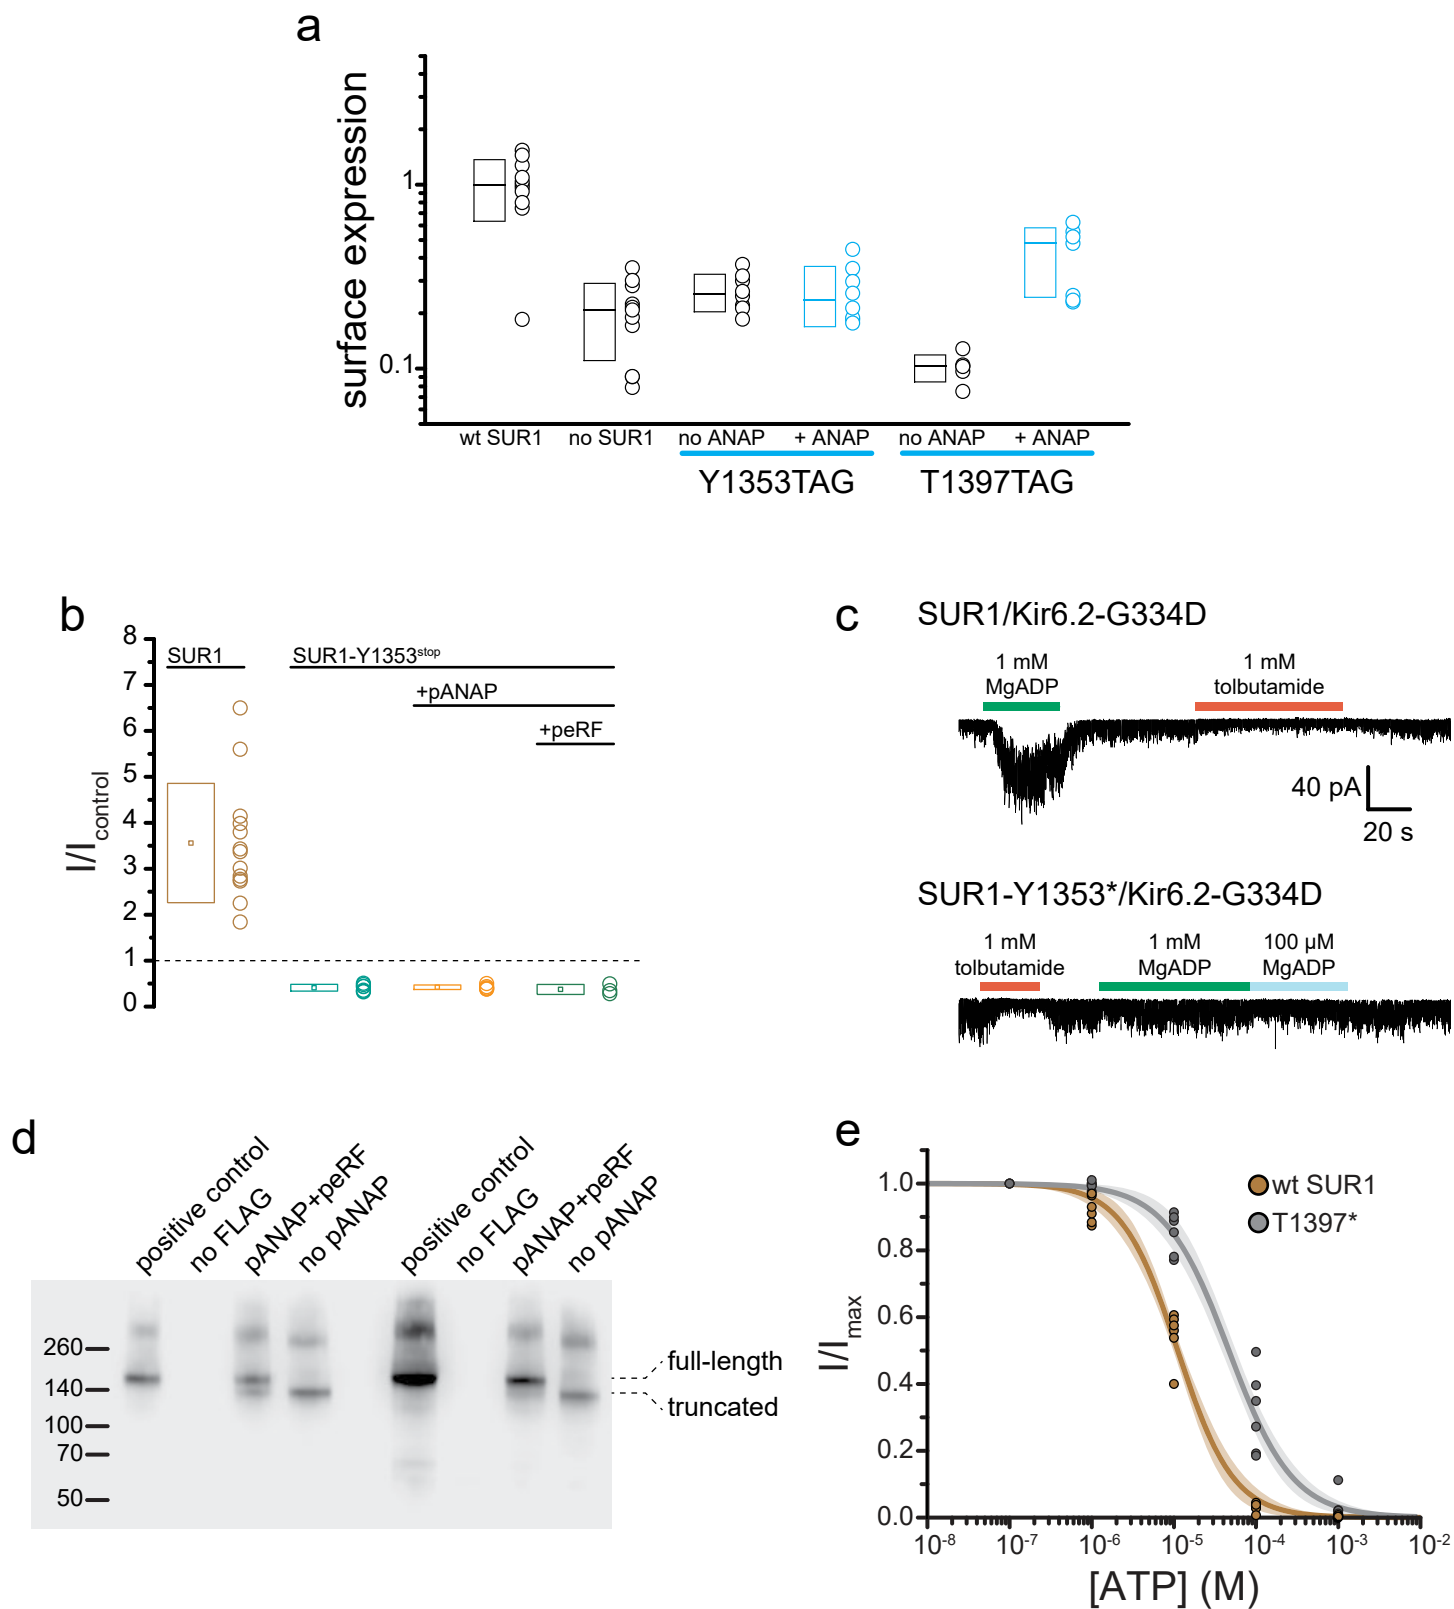

Figure 4--figure supplement 1

Supplement: supp [file elife-41103-supp-v1.zip]

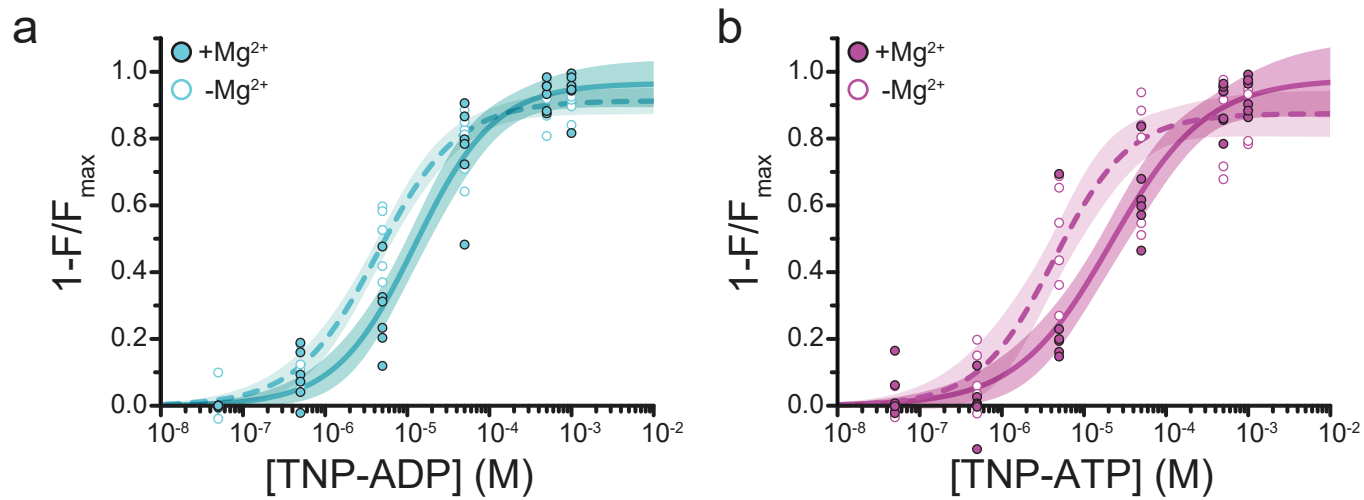

Figure 3--figure supplement 1

Supplement: supp [file elife-41103-supp-v1.zip]

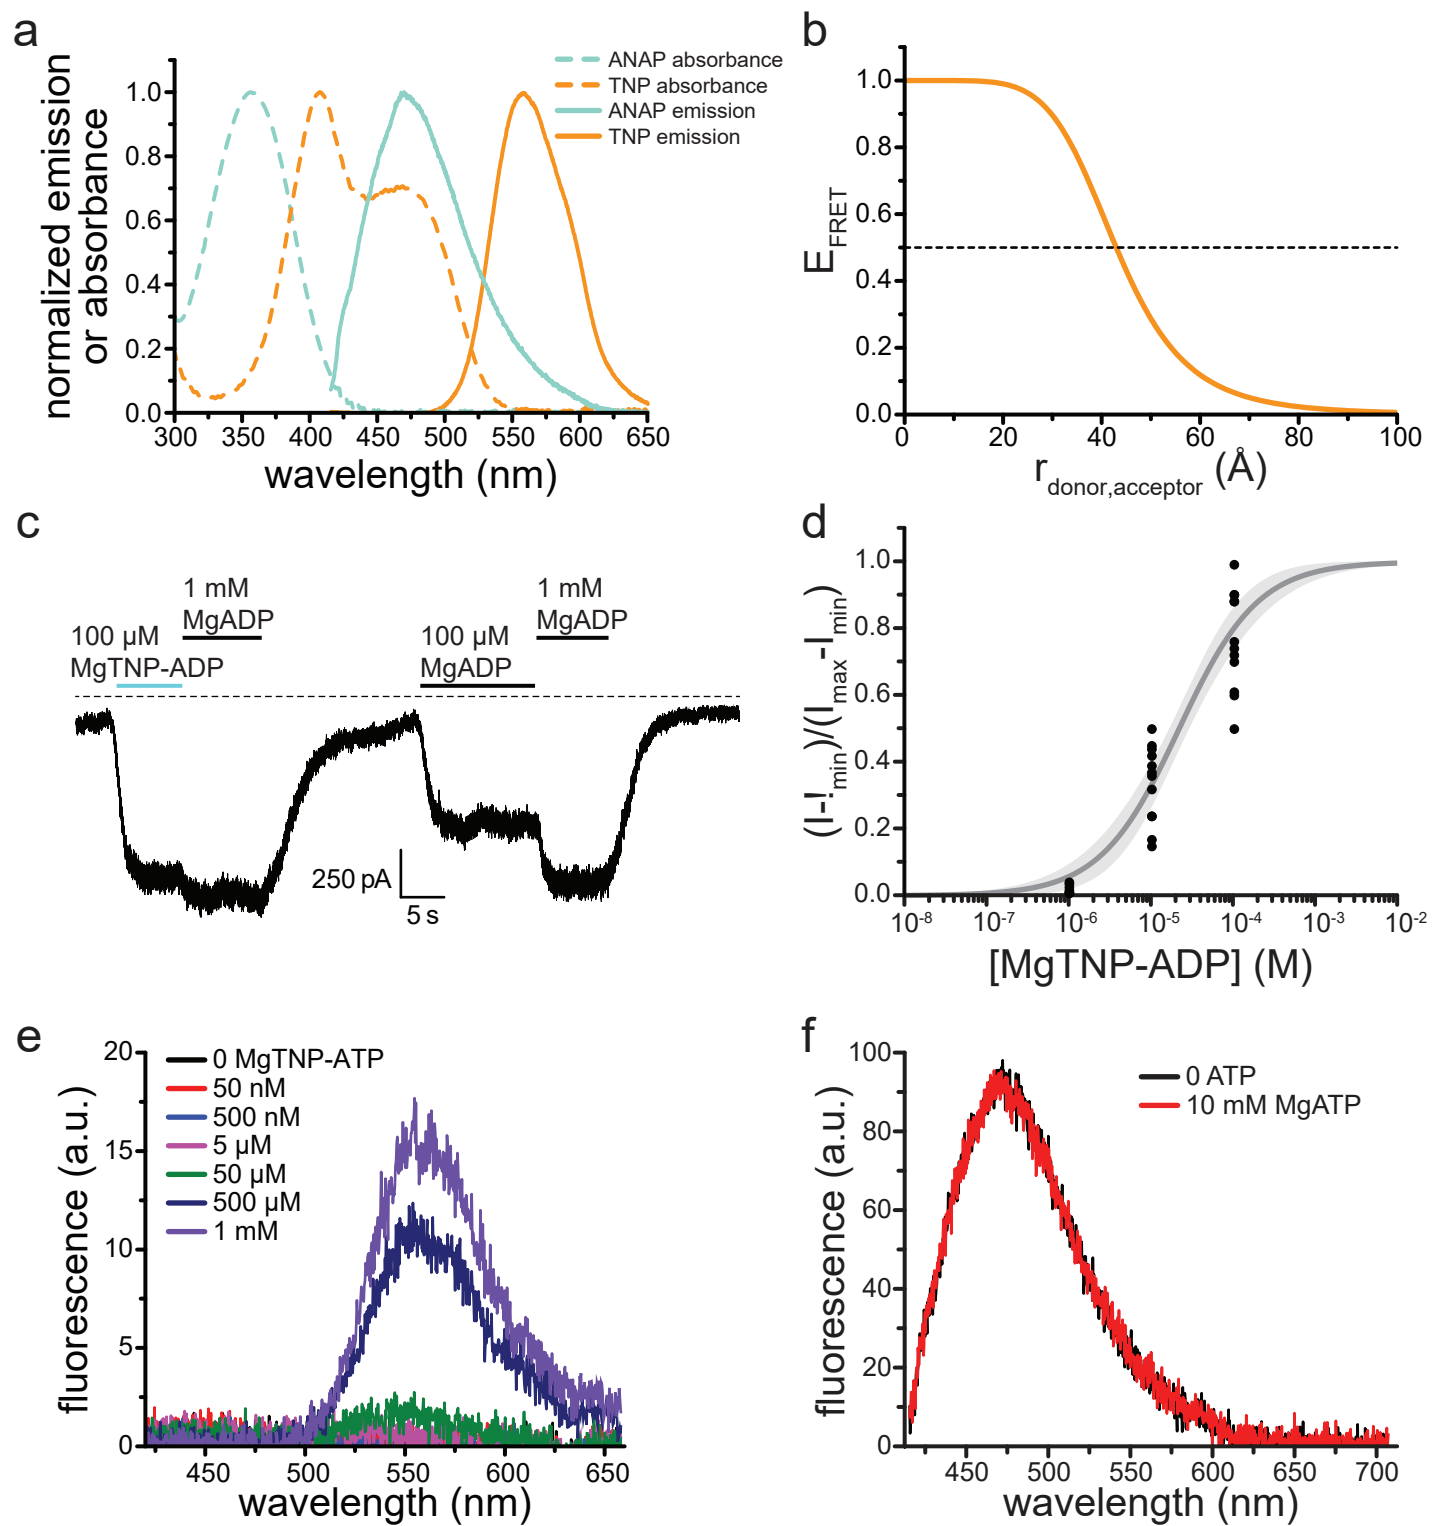

Figure 1--figure supplement 2

Supplement: supp [file elife-41103-supp-v1.zip]

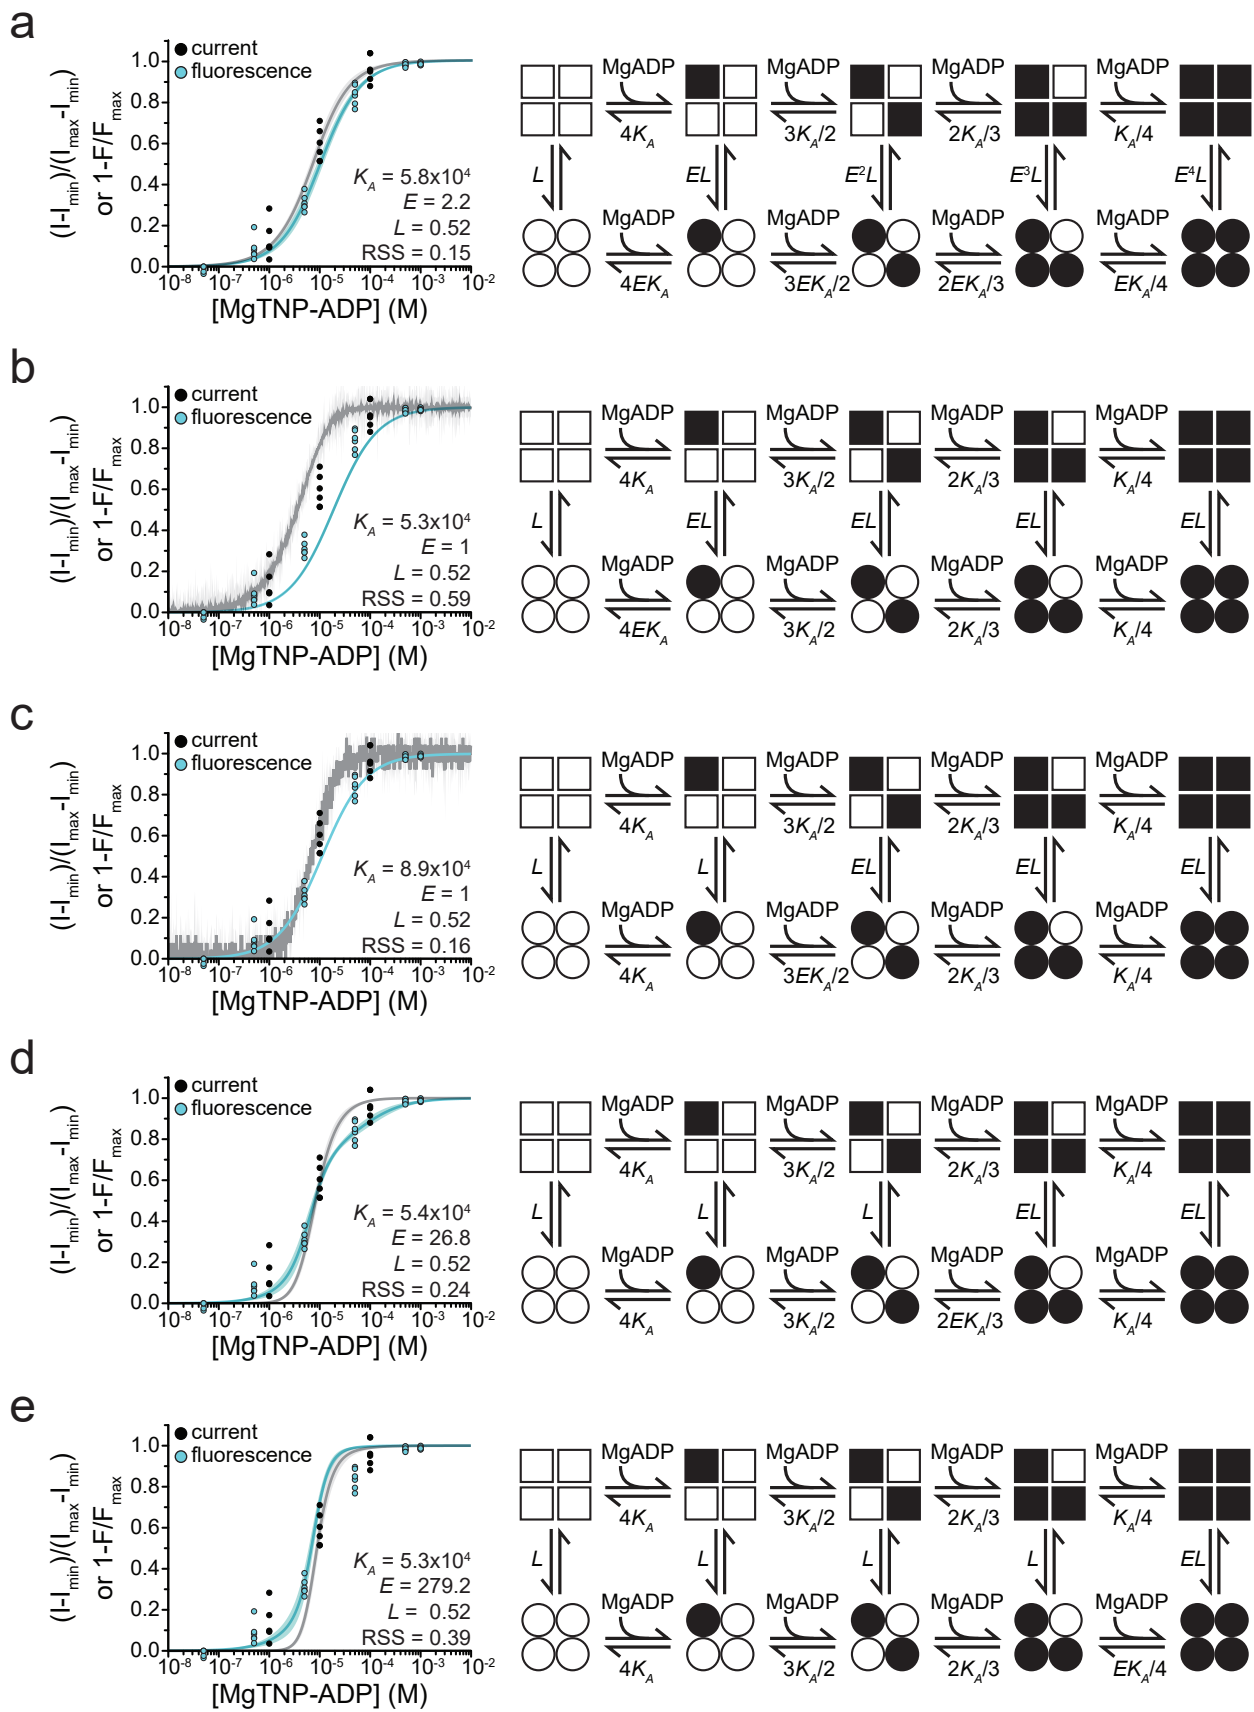

Figure 5--figure supplement 1

Supplement: supp [file elife-41103-supp-v1.zip]

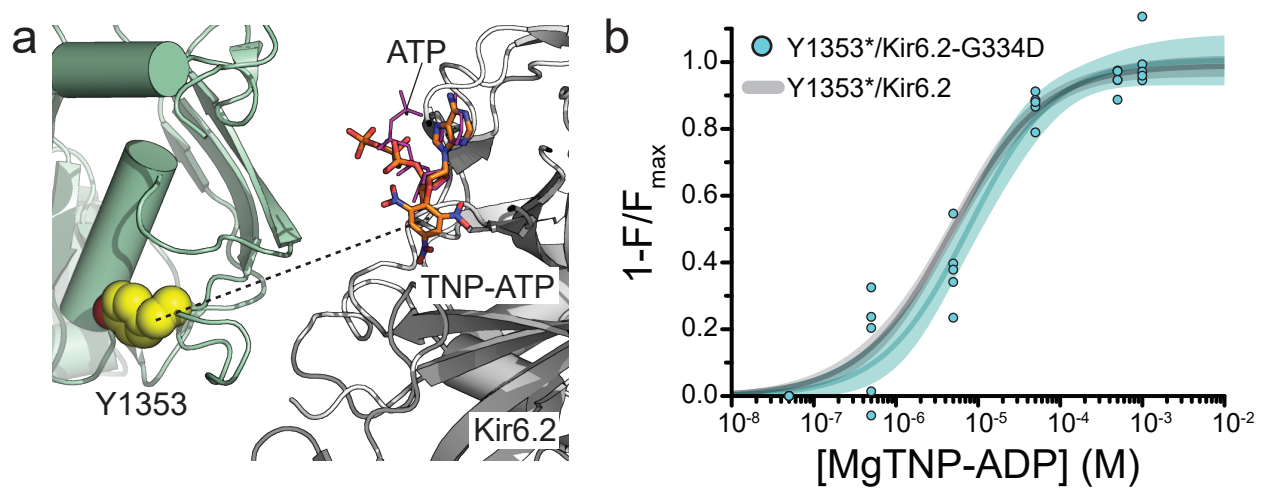

Figure 1--figure supplement 3

Supplement: supp [file elife-41103-supp-v1.zip]

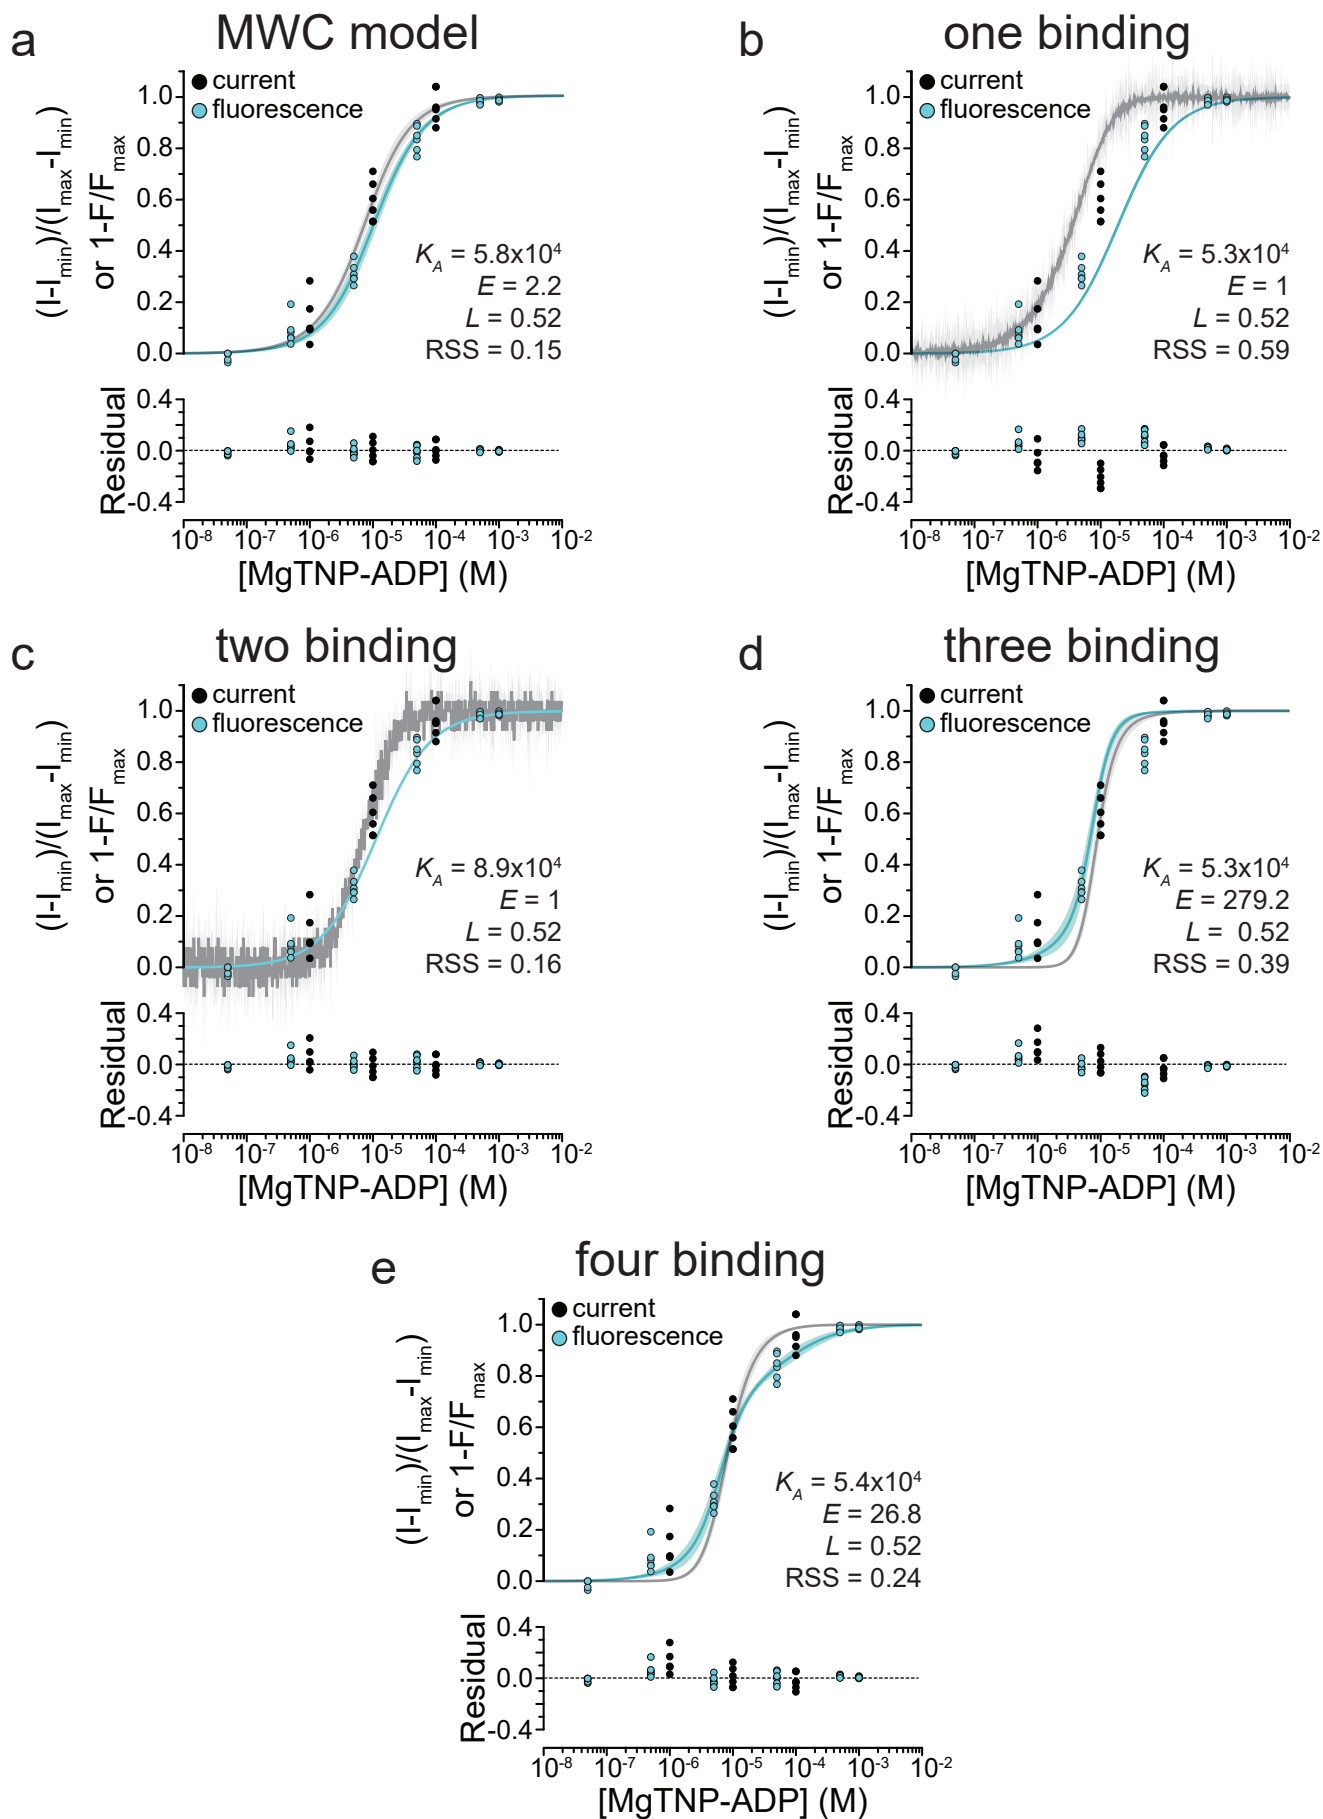

Figure 5--figure supplement 2

Supplement: supp [file elife-41103-supp-v1.zip]

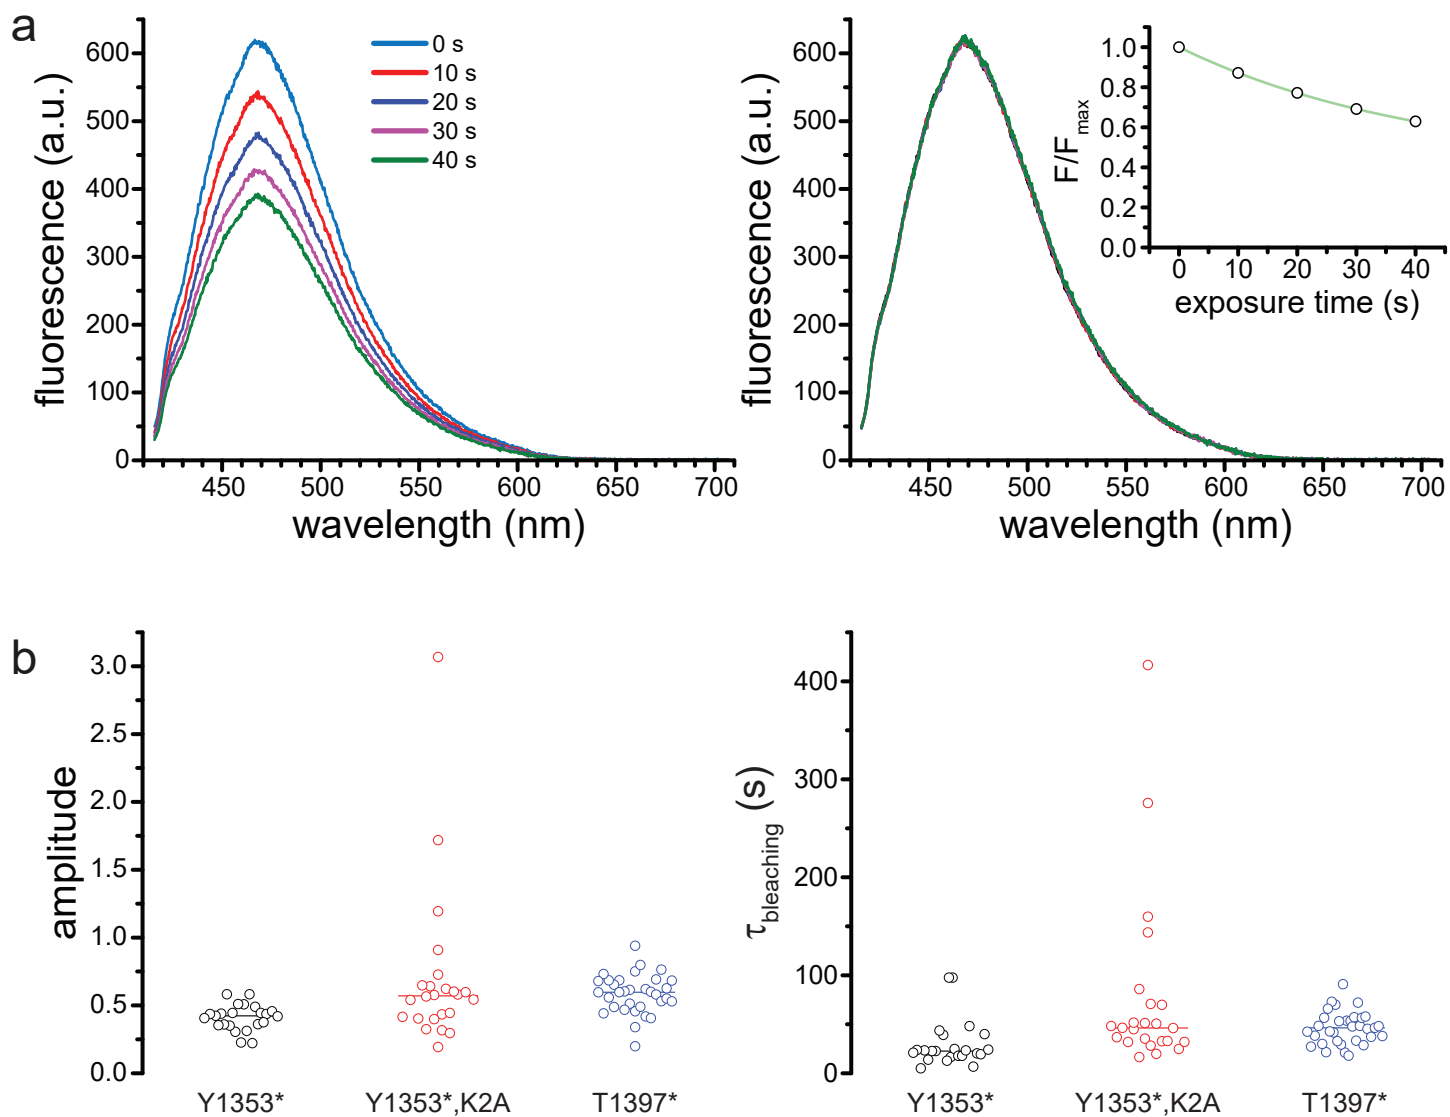

Figure 1--figure supplement 5

Supplement: supp [file elife-41103-supp-v1.zip]

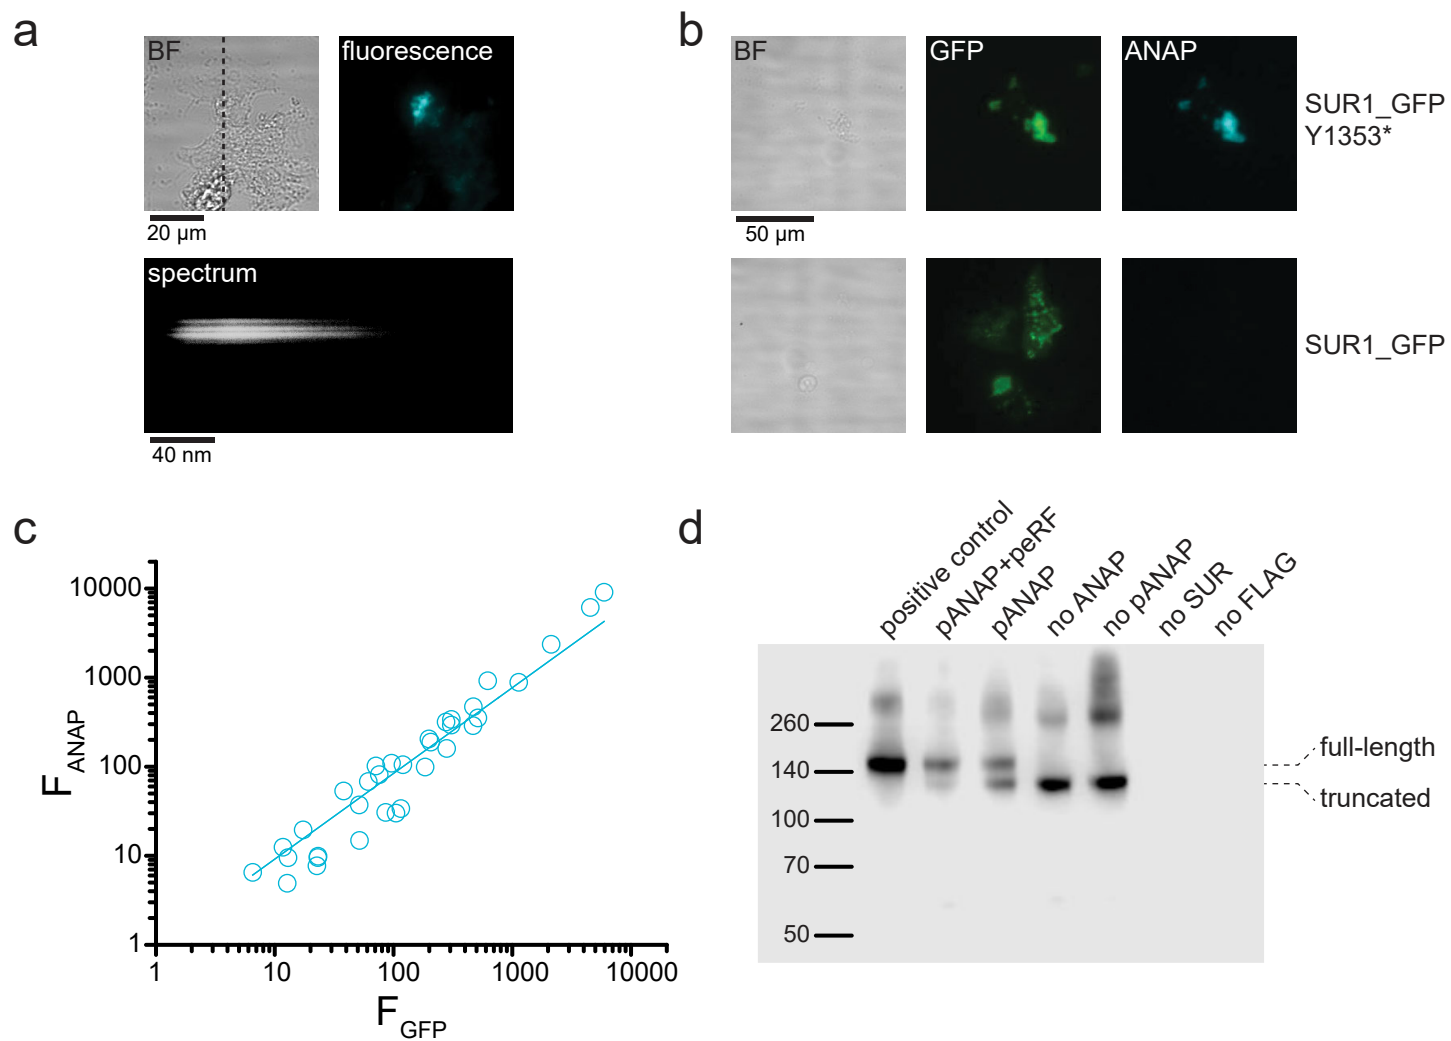

Figure 1--figure supplement 1

Supplement: supp [file elife-41103-supp-v1.zip]

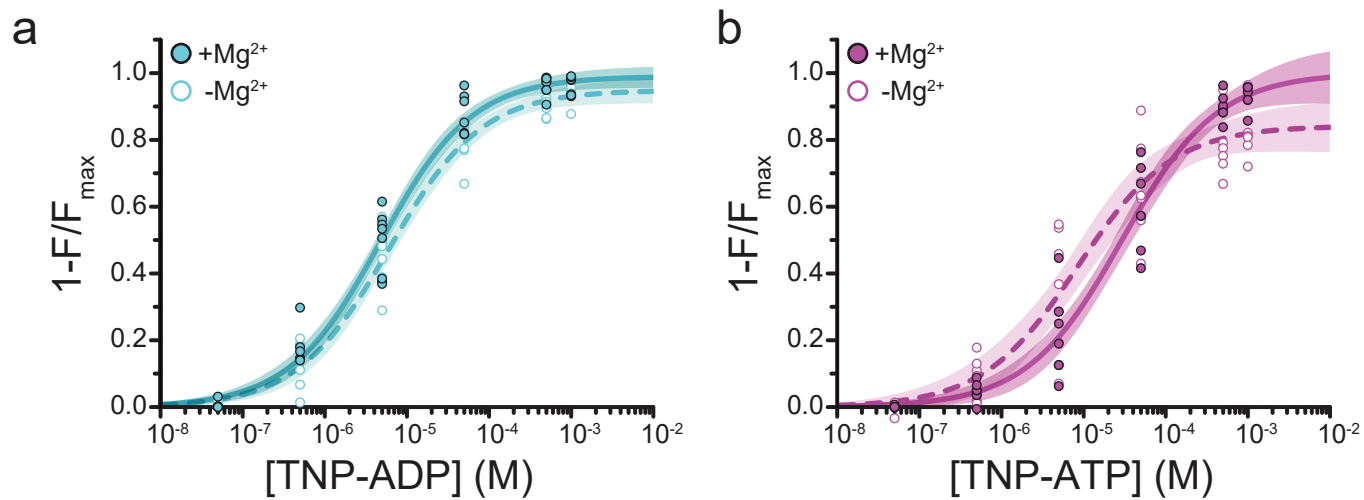

Figure 1--figure supplement 4

Supplement: supp [file elife-41103-supp-v1.zip]
